# Supplementary material for: Shockwaves Suppress Adipocyte Differentiation via Decrease in PPARγ
Source: MDPI journal article supplement (doi:10.3390/cells9010166), 2020-01-09
Supplement: s1 [file s1]

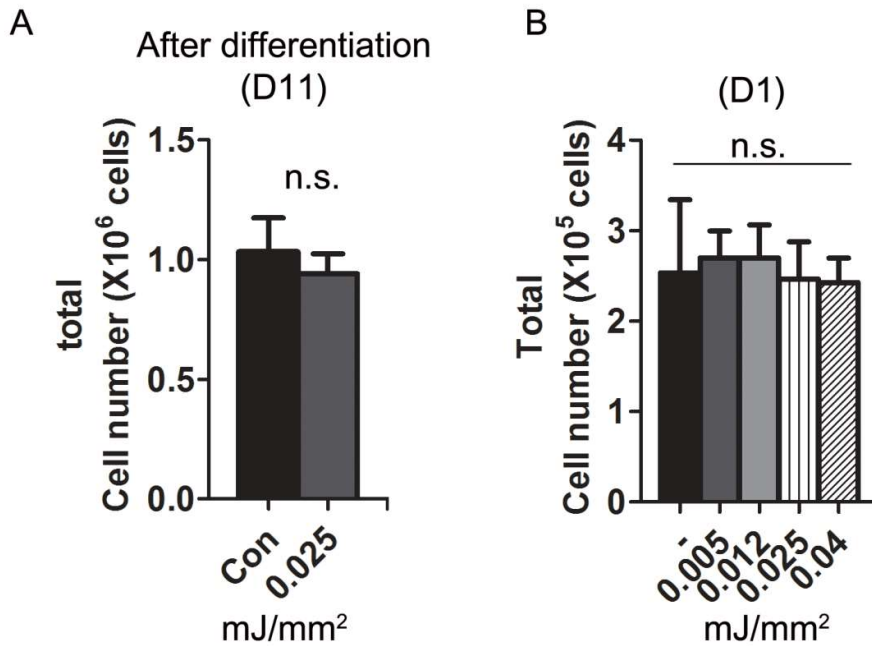

**Supplementary Figure 1.** There was no difference in total cell number after shockwaves-treatment. (A) After fully differentiation, 5<sup>th</sup> times shockwave treatment (D11), 0.025 mJ/mm<sup>2</sup> shockwave-treatment resulted in no significant total cell number difference compared with untreated cells. (B) 1<sup>st</sup> time shockwave (0.005, 0.012, 0.025 and 0.04 mJ/mm<sup>2</sup>) treatment (D1) resulted in no significant cell number difference compared with untreated cells. Cells were trypsinized and total cell numbers were counted by Luna™ automated cell counter (Logos Biosystems, Anyang-Si, South Korea).

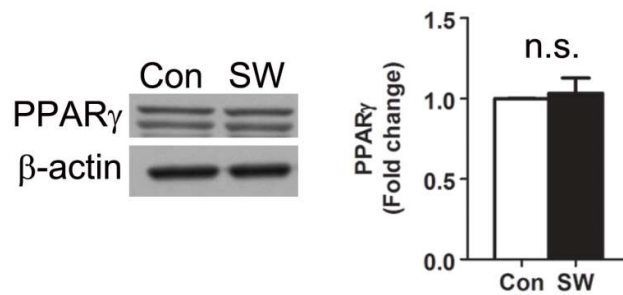

**Supplementary Figure 2.** Shockwave treatment did not affect the level of PPAR $\gamma$  after fully differentiated 3T3L-1. 3T3L-1 was fully differentiated (D14) and then cells were treated with or without shockwaves. Next day, cells were harvested for immune blot with anti-PPAR $\gamma$ .  $\beta$ -actin was used as internal control. Quantification result of PPAR $\gamma$  (Right graph).
